# Supplementary material
Source: PubMed Central journal article supplement (PMC7736187)

## **Supplementary Material**

**Supplementary Figure 1.** Boxplot indicating individual data points, median, first and third quartiles for PVN AVP-expressing cell counts throughout four anterior-posterior sections of the PVN of control and cell-ablated animals. A significant decrease in AVP-expressing cell number within each PVN section was observed in cell-deleted males and females, compared to controls.

**Supplementary Table 1.** Median and range of investigatory and communicative responses within the 3 chamber apparatus to male or female urine stimuli within the three-chamber apparatus. Cell-deleted and control subjects did not differ in social investigation, urine marking or USV counts in the presence of either male or female urine.

**Supplementary Figure 2.** Boxplot indicating individual data points, median, first and third quartiles for USV syllable types emitted by male and female subjects in response to male (a, b) and female (c,d) stimuli. PVN AVP-expressing cell ablation did not alter the percentage of USV syllable types produced.

**Supplementary Table 1.** Median and range of investigatory and communicative responses within the 3 chamber apparatus to male or female urine stimuli within the three-chamber apparatus. Cell-deleted and control subjects did not differ in social investigation, urine marking or USV counts in the presence of either male or female urine.

| genotype                 | <u>male subjects</u> |                 |                  |                 | <u>female subjects</u> |              |               |               |
|--------------------------|----------------------|-----------------|------------------|-----------------|------------------------|--------------|---------------|---------------|
|                          | Cre-                 | Cre+            |                  | Cre-            | Cre+                   |              | Cre-          | Cre+          |
| stimulus                 | <i>female</i>        | <i>male</i>     | <i>female</i>    | <i>male</i>     | <i>female</i>          | <i>male</i>  | <i>female</i> | <i>male</i>   |
| social investigation (s) | 18 (6-27)            | 10 (3-18)       | 14 (1-32)        | 11 (1-27)       | 6 (1-22)               | 4 (2-15)     | 5 (0-26)      | 6 (1-17)      |
| urine marking (pixels)   | 17815 (0-2068194)    | 5826 (0-749476) | 6285 (0-1998000) | 300 (0-1710944) | 0 (0-11693)            | 0 (0-791312) | 0 (0-1898424) | 0 (0-1735449) |
| USV (count)              | 5 (0-290)            | 2 (0-29)        | 0 (0-69)         | 0 (0-9)         | 0 (0-5)                | 0 (0-14)     | 0 (0-5)       | 0 (0-9)       |

a.

males

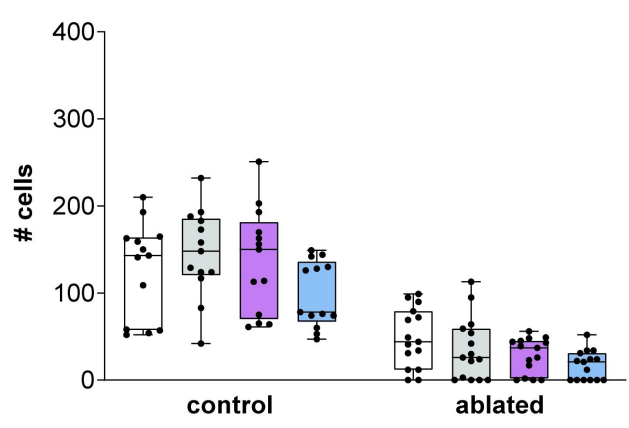

b.

females

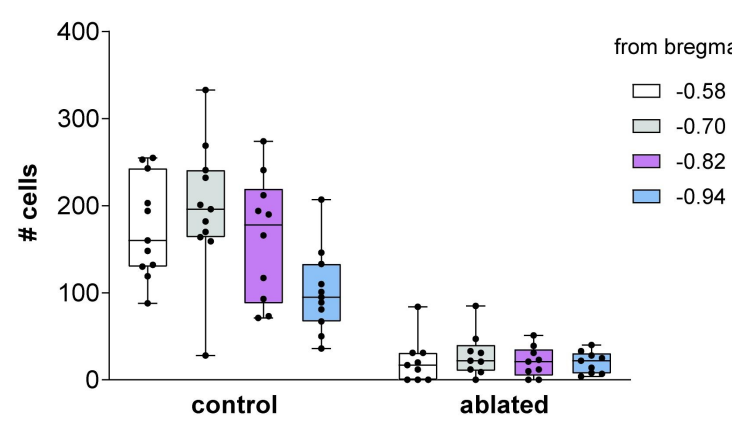

**a.****males**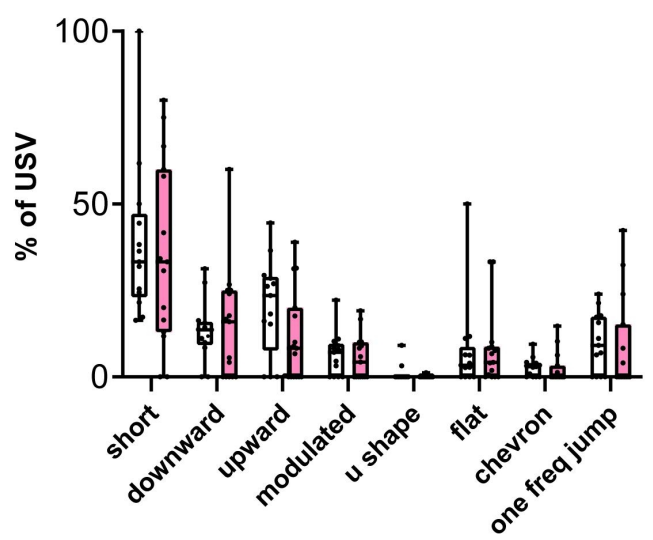**b.****females**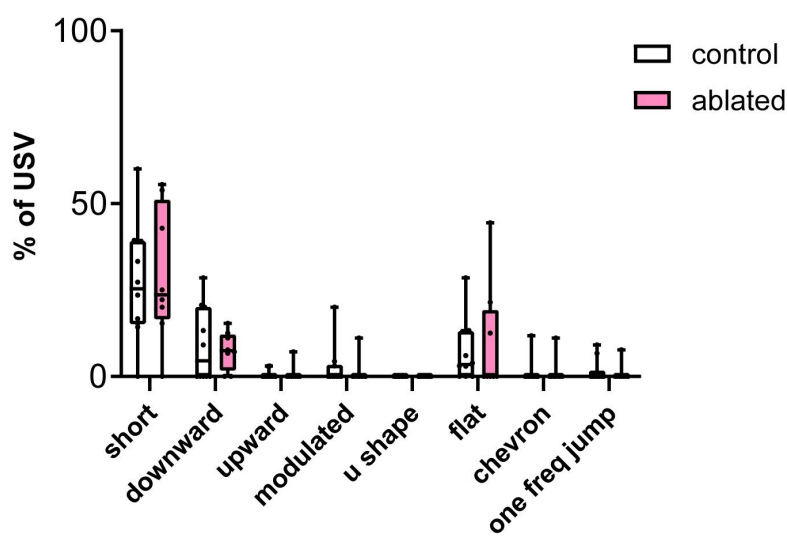**c.**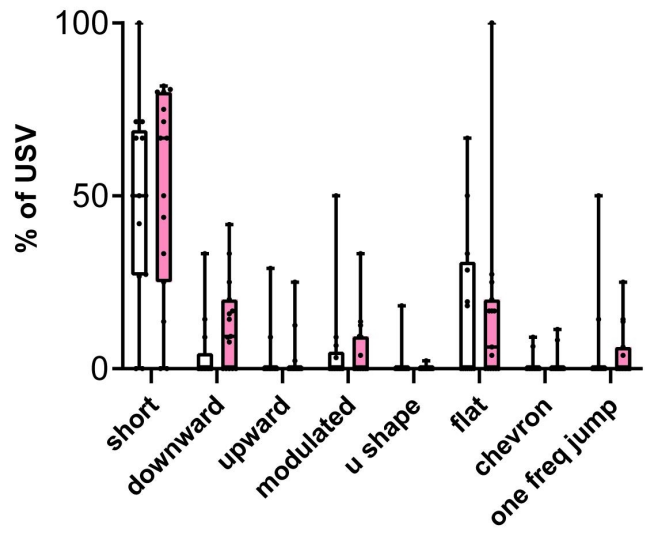**d.**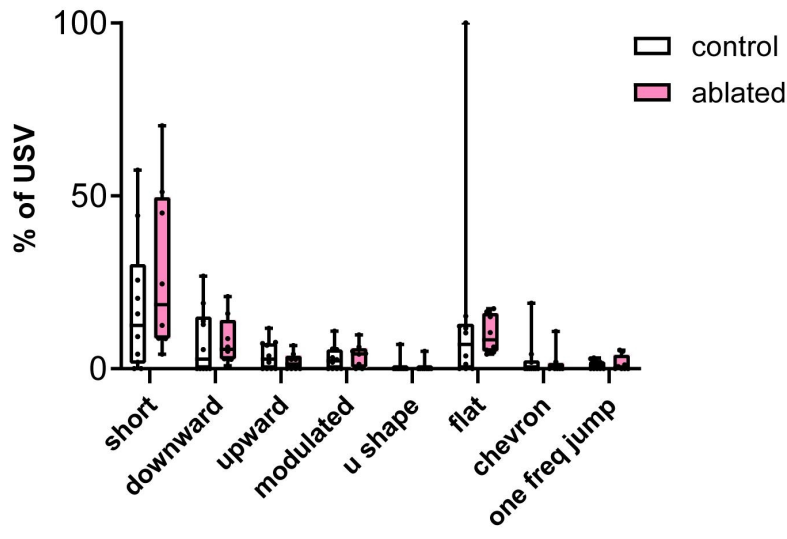

Supplement: NIHMS1607861-supplement-1.pdf [file NIHMS1607861-supplement-1.pdf]
